# Supplementary material
Source: publisher site journal article supplement (https://www.dovepress.com/article/428677)
Supplement: Supplementary file 1 [file get_supplementary_file.php]

## **Demographic Questionnaire**

**Code number**: ……………………………

**Participant ethnicity**; Sinhala ( ) Tamil ( ) Muslim ( ) Other ( )

**Is participant currently following an undergraduate degree?** Yes ( ) No ( )

**University name**: University of Colombo ( ) Open University ( )

University of Moratuwa ( ) University of Sri Jayawrdhanapura ( ) University of visual and Performing arts ( )

**Choose (√) the suitable answer to describe yourself**

**Participant age**: 19 – 24 ( ) 25 - 30 ( )

**Gender**: Female ( ) Male ( )

**Participant Currently living family Type**: Nuclear Family ( )

Extended Family ( )

Single parent Family ( )

Stepfamily ( )

Grandparents’ family ( )

**Marital status**: Married ( ) Single ( )

**Do you have undergone any of the clinically diagnosed**

**mental health conditions during the last 3 to 6 months**

**period?** Yes ( ) No ( )

**Wong and Law Emotional Intelligence Scale**

Here is a short 16-item measure of emotional intelligence, developed for use in management research and studies. The items on the Wong and Law Emotional Intelligence Scale (WLEIS) is based on the ability model of emotional intelligence. A list of statements are provided below, and to complete this questionnaire, mark the extent to which you agree or disagree to each of the statements.

|  | Strongly Disagree | Disagree | Slightly Disagree | Neither Agree nor  Disagree | Slightly Agree | Agree | Strongly Agree |
| --- | --- | --- | --- | --- | --- | --- | --- |
| 1. I have a good sense of why I feel certain feelings most of the time. |  |  |  |  |  |  |  |
| 2. I have a good understanding of my own emotions. |  |  |  |  |  |  |  |
| 3. I really understand what I feel. |  |  |  |  |  |  |  |
| 4. I always know whether I am happy or not. |  |  |  |  |  |  |  |
| 5. I always know my friends’ emotions from their behaviour |  |  |  |  |  |  |  |
| 6. I am a good observer of others’ emotions. |  |  |  |  |  |  |  |
| 7. I am sensitive to the feelings and emotions of others. |  |  |  |  |  |  |  |
| 8. I have a good understanding of the emotions of people around me. |  |  |  |  |  |  |  |
| 9. I always set goals for myself and then try my best to achieve them. |  |  |  |  |  |  |  |
| 10. I always tell myself I am a competent person |  |  |  |  |  |  |  |
| 11. I am a self-motivating person. |  |  |  |  |  |  |  |
| 12. I would always encourage myself to try my best. |  |  |  |  |  |  |  |
| 13. I am able to control my temper so that I can handle difficulties rationally. |  |  |  |  |  |  |  |
| 14. I am quite capable of controlling my own emotions. |  |  |  |  |  |  |  |
| 15. I can always calm down quickly when I am very angry. |  |  |  |  |  |  |  |
| 16. I have good control of my emotions. |  |  |  |  |  |  |  |

**Note**: Adapted from Wong CS, Law KS. The effects of leader and follower emotional intelligence on performance and attitude: An exploratory study. *Science*. 2002;13(3):243-274.

**INTERNATIONAL PHYSICAL ACTIVITY QUESTIONNAIRE**

We are interested in finding out about the kinds of physical activities that people do as part of their everyday lives. The questions will ask you about the time you spent being physically active in the **last 7 days**. Please answer each question even if you do not consider yourself to be an active person. Please think about the activities you do at work, as part of your house and yard work, to get from place to place, and in your spare time for recreation, exercise or sport.

**PART 1: JOB-RELATED PHYSICAL ACTIVITY**

The first section is about your work. This includes paid jobs, farming, volunteer work, course work, and any other unpaid work that you did outside your home. Do not include unpaid work you might do around your home, like housework, yard work, general maintenance, and caring for your family. These are asked in Part 3.

**1**.Do you currently have a job or do any unpaid work outside your home?

#### **Yes**

No ***Skip to PART 2: TRANSPORTATION***

The next questions are about all the physical activity you did in the **last 7 days** as part of your paid or unpaid work. This does not include traveling to and from work.

**2.** During the **last 7 days**, on how many days did you do **vigorous** physical activities like heavy lifting, digging, heavy construction, or climbing up stairs **as part of your work**? Think about only those physical activities that you did for at least 10 minutes at a time.

_____ Days per week

No vigorous job-related physical activity ***Skip to question 4***

**3**. How much time did you usually spend on one of those days doing **vigorous** physical activities as part of your work?

_____ hours per day

_____ minutes per day

**4**. Again, think about only those physical activities that you did for at least 10 minutes at a time. During the **last 7 days**, on how many days did you do **moderate** physical activities like carrying light loads **as part of your work**? Please do not include walking.

_____ days per week

No moderate job-related physical activity ***Skip to question 6***

**5.**How much time did you usually spend on one of those days doing **moderate** physical activities as part of your work?

_____ hours per day

_____ minutes per day

**6**. During the **last 7 days**, on how many days did you **walk** for at least 10 minutes at a time **as part of your work**? Please do not count any walking you did to travel to or from work.

_____ days per week

No job-related walking ***Skip to PART 2: TRANSPORTATION***

**7.** How much time did you usually spend on one of those days **walking** as part of your work?

_____ hours per day

_____ minutes per day

**PART 2: TRANSPORTATION PHYSICAL ACTIVITY**

These questions are about how you traveled from place to place, including to places like work, stores, movies, and so on.

**8**. During the **last 7 days**, on how many days did you **travel in a motor vehicle** like a train, bus, car, or tram?

_____ days per week

No traveling in a motor vehicle ***Skip to question 10***

**9.** How much time did you usually spend on one of those days **traveling** in a train, bus, car, tram, or other kind of motor vehicle?

_____ hours per day

_____ minutes per day

Now think only about the **bicycling** and **walking** you might have done to travel to and from work, to do errands, or to go from place to place.

10. During the **last 7 days**, on how many days did you **bicycle** for at least 10 minutes at a time to go **from place to place**?

_____ days per week

No bicycling from place-to-place ***Skip to question 12***

**11.** How much time did you usually spend on one of those days to **bicycle** from place to place?

_____ hours per day

_____ minutes per day

**12.**During the **last 7 days**, on how many days did you **walk** for at least 10 minutes at a time to go **from place to place**?

_____ days per week

No walking from place to place ***skip to part 3: housework, house maintenance, and caring for family***

***13.*** *How much time did you usually spend on one of those days walking from place to place?* hours per day ________

minutes per day ________

***PART 3: HOUSEWORK, HOUSE MAINTENANCE, AND CARING FOR FAMILY***

This section is about some of the physical activities you might have done in the **last 7 days** in and around your home, like housework, gardening, yard work, general maintenance work, and caring for your family.

**14.**Think about only those physical activities that you did for at least 10 minutes at a time. During the **last 7 days**, on how many days did you do **vigorous** physical activities like heavy lifting, chopping wood, shoveling snow, or digging **in the garden or yard**?

_____ days per week

No vigorous activity in garden or yard ***Skip to question 16***

**15**. How much time did you usually spend on one of those days doing **vigorous** physical activities in the garden or yard?

_____ hours per day

_____ minutes per day

**16.** Again, think about only those physical activities that you did for at least 10 minutes at a time. During the **last 7 days**, on how many days did you do **moderate** activities like carrying light loads, sweeping, washing windows, and raking **in the garden or yard**?

_____ days per week

No moderate activity in garden or yard ***Skip to question 18***

**17.** How much time did you usually spend on one of those days doing **moderate** physical activities in the garden or yard?

_____ hours per day

_____ minutes per day

**18.** Once again, think about only those physical activities that you did for at least 10 minutes at a time. During the **last 7 days**, on how many days did you do **moderate** activities like carrying light loads, washing windows, scrubbing floors and sweeping **inside your home**?

_____ days per week

No moderate activity inside home ***skip to part 4: recreation, sport and leisure-time physical activity***

**19**. How much time did you usually spend on one of those days doing **moderate** physical activities inside your home?

_____ hours per day

_____ minutes per day

***PART 4: RECREATION, SPORT, AND LEISURE-TIME PHYSICAL ACTIVITY***

This section is about all the physical activities that you did in the **last 7 days** solely for recreation, sport, exercise or leisure. Please do not include any activities you have already mentioned.

**20.** Not counting any walking you have already mentioned, during the **last 7 days**, on how many days did you **walk** for at least 10 minutes at a time **in your leisure time**?

_____ days per week

No walking in leisure time ***Skip to question 22***

**21.** How much time did you usually spend on one of those days **walking** in your leisure time?

_____ hours per day

_____ minutes per day

**22.** Think about only those physical activities that you did for at least 10 minutes at a time. During the **last 7 days**, on how many days did you do **vigorous** physical activities like aerobics, running, fast bicycling, or fast swimming **in your leisure time**?

_____ days per week

No vigorous activity in leisure time ***Skip to question 24***

**23.** How much time did you usually spend on one of those days doing **vigorous** physical activities in your leisure time?

_____ hours per day

_____ minutes per day

**24**. Again, think about only those physical activities that you did for at least 10 minutes at a time. During the **last 7 days**, on how many days did you do **moderate** physical activities like bicycling at a regular pace, swimming at a regular pace, and doubles tennis **in your leisure time**?

_____ Days per week

No moderate activity in leisure time ***Skip to PART 5: TIME SPENT SITTING***

**25**. How much time did you usually spend on one of those days doing **moderate** physical activities in your leisure time?

_____ hours per day

_____ minutes per day

***PART 5: TIME SPENT SITTING***

The last questions are about the time you spend sitting while at work, at home, while doing course work and during leisure time. This may include time spent sitting at a desk, visiting friends, reading or sitting or lying down to watch television. Do not include any time spent sitting in a motor vehicle that you have already told me about.

**26**.During the **last 7 days**, how much time did you usually spend **sitting** on a **weekday**?

_____ hours per day

_____ minutes per day

**27**. During the **last 7 days**, how much time did you usually spend **sitting** on a **weekend day**?

_____ hours per day

_____ minutes per day

……………. **This is the end of the questionnaire, thank you for participating………….**

**Note:** Adapted from Craig CL, Marshall AL, SJÖSTRÖM M, et al. International physical activity questionnaire: 12-country reliability and validity. *Med Sci Sports Exerc*. 2003;35: 1381-1395. Creative Commons.
